# Supplementary material for: A Prospective, Phase 1 Trial of Nivolumab, Ipilimumab, and Radiotherapy in Patients with Advanced Melanoma
Source: Oxford University Press journal article supplement (doi:10.1158/1078-0432.ccr-19-3936), 2020-03-23
Supplement: 10780432ccr193936-sup-233335_2_supp_6143056_q6sp0g.docx [file 10780432ccr193936-sup-233335_2_supp_6143056_q6sp0g.docx]

**Supplemental Table 2.**

| **Patient** | **RT Site** | **Response in Irradiated Volume** | **Baseline RECIST Sum of Target Irradiated Volume (mm)** |
| --- | --- | --- | --- |
| **1** | Lung, Lymph node, Muscle / soft tissue | PR | 43 |
| **2** | Lymph node | CR | 16 |
| **3** | Muscle / soft tissue | CR | 14 |
| **4** | Lymph node | NE* | 45 |
| **5** | Liver | SD | 116 |
| **6** | Lymph node | CR | 24 |
| **7** | Bone | NE | NE |
| **8** | Liver, Bone | NE | 18 |
| **9** | Muscle / soft tissue | NE | NE |
| **10** | Adrenal | PR | 25 |
| **11** | Skin, Bone | PR | 31 |
| **12** | Muscle / soft tissue | PR | 58 |
| **13** | Bone | NE | NE |
| **14** | Lung | SD | 37 |
| **15** | Breast, Skin | SD | 85 |
| **16** | Muscle / soft tissue | SD | 73 |
| **17** | Skin | SD | 60 |
| **18** | Lymph node, Muscle / soft tissue | SD | 35 |
| **19** | Rectum, Bone | PR | 64 |
| **20** | Bone, Lymph node | PR | 42 |

*NE is “Not Evaluable
