# Supplementary material for: A Prospective, Phase 1 Trial of Nivolumab, Ipilimumab, and Radiotherapy in Patients with Advanced Melanoma
Source: Oxford University Press journal article supplement (doi:10.1158/1078-0432.ccr-19-3936), 2020-03-23
Supplement: 10780432ccr193936-sup-233335_2_supp_6143060_q6sp0g.docx [file 10780432ccr193936-sup-233335_2_supp_6143060_q6sp0g.docx]

**Supplemental Figure 2:**


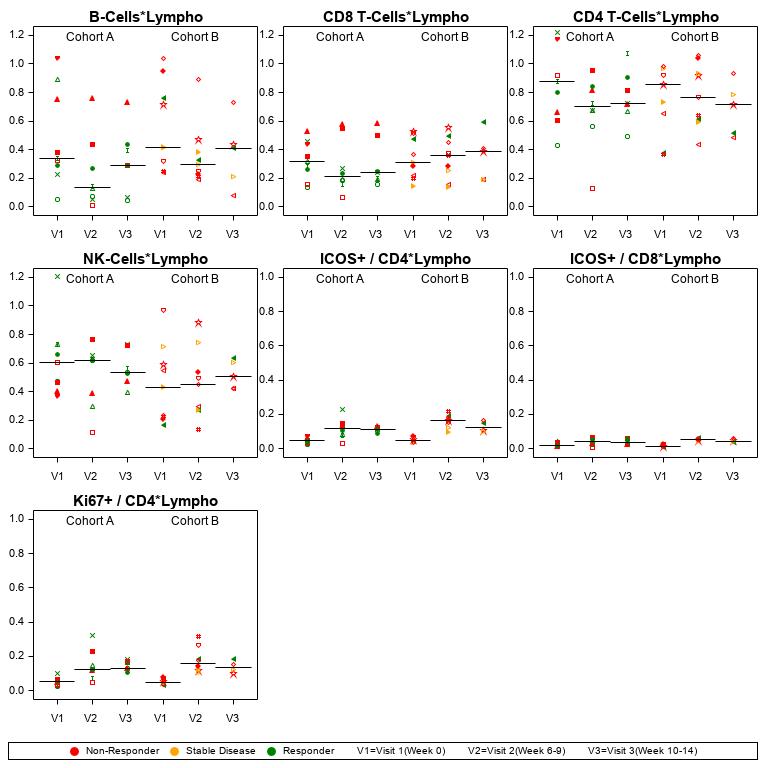


**Supplemental Figure 2:** Absolute numbers (absolute lymphocyte count * proportion) of designated cell populations at pre-treatment baseline (V1); after the completion of RT/prior to the 3rd dose of immunotherapy (week 6-9, V2); and at the timepoint of first radiographic assessment (Week 10-14, V3). Patients with response (green), stable disease (yellow), and progressive disease (red) outside of the irradiated volume are shown. Symbols reflect unique patients.
