# Supplementary material for: A Prospective, Phase 1 Trial of Nivolumab, Ipilimumab, and Radiotherapy in Patients with Advanced Melanoma
Source: Oxford University Press journal article supplement (doi:10.1158/1078-0432.ccr-19-3936), 2020-03-23
Supplement: 10780432ccr193936-sup-233335_2_supp_6143061_q6sp0g.docx [file 10780432ccr193936-sup-233335_2_supp_6143061_q6sp0g.docx]

**Supplemental Figure 3:**

**Supplemental Figure 3:** Levels of eotaxin were higher in cohort A compared to cohort B. Patients with response in cohort A appeared to have high levels of eotaxin. Symbols reflect unique patients.
